# Supplementary material for: Natural Deep Eutectic Solvents for the Extraction of Spilanthol from Acmella oleracea (L.) R.K.Jansen
Source: MDPI journal article supplement (doi:10.3390/molecules29030612), 2024-01-27
Supplement: s1 [file s1]

# Natural Deep Eutectic Solvents for the Extraction of Spilanthol from *Acmella oleracea* (L.) R.K.Jansen

## Supplementary Materials

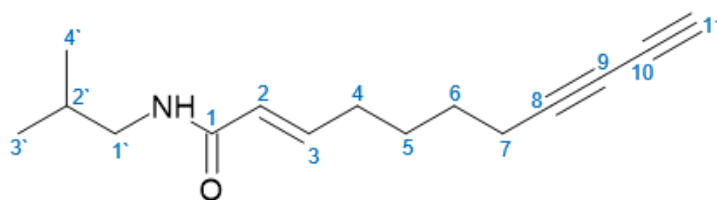

**Figure S1.** Structure of substance 3 (2E)-N-isobutyl-2-undecene-8,10-diynamide.

**Table S1.** NMR-data of substance 3 (2E)-N-isobutyl-2-undecene-8,10-diynamide in CDCl<sub>3</sub> (700 MHz).

| Position | $\delta^{13}\text{C}$ [ppm] | $\delta^1\text{H}$ [ppm], Mult. <sup>1</sup> (J in Hz) |
|----------|-----------------------------|--------------------------------------------------------|
| 1        | 165.9                       | -                                                      |
| 2        | 124.1                       | 5.78, d (15.2)                                         |
| 3        | 143.8                       | 6.82, dt (15.2, 7.0)                                   |
| 4        | 31.3                        | 2.20, q (6.3)                                          |
| 5        | 27.2                        | 1.58                                                   |
| 6        | 27.4                        | 1.58                                                   |
| 7        | 18.9                        | 2.28, m                                                |
| 8        | 77.9                        | -                                                      |
| 9        | 65.0                        | -                                                      |
| 10       | 68.4                        | -                                                      |
| 11       | 64.7                        | 1.97, s                                                |
| 1'       | 46.9                        | 3.16, t (6.4)                                          |
| 2'       | 28.6                        | 1.80, m                                                |
| 3'       | 20.2                        | 0.93, d (6.5)                                          |
| 4'       | 20.2                        | 0.93, d (6.5)                                          |
| -NH      | -                           | 5.44, brs                                              |

<sup>1</sup> s: singlet, brs: broad singlet, d: doublet, t: triplet, dt: doublet of triplets, q: quadruplet, m: multiplet, multiplicities are given only for not overlapping resonances.

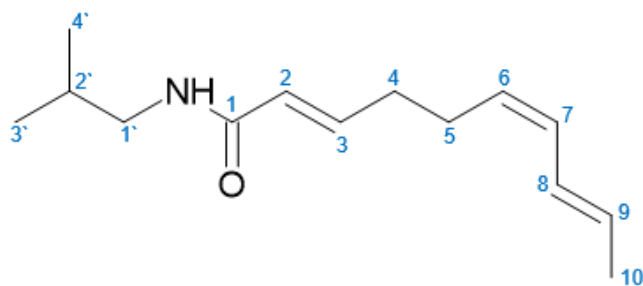

**Figure S2.** Structure of substance **5** (2E,6Z,8E)-N-isobutyl-2,6,8-decatrienamide (spilanthol).

**Table S2.** NMR-data of substance **5** (2E,6Z,8E)-N-isobutyl-2,6,8-decatrienamide (spilanthol) in CDCl<sub>3</sub> (400 MHz).

| Position | $\delta^{13}\text{C}$ [ppm] | $\delta^1\text{H}$ [ppm], Mult. <sup>1</sup> (J in Hz) |
|----------|-----------------------------|--------------------------------------------------------|
| 1        | 166.0                       | -                                                      |
| 2        | 124.2                       | 5.81, brd (15.4)                                       |
| 3        | 143.5                       | 6.83, dt (15.3, 6.7)                                   |
| 4        | 32.1                        | 2.26, m                                                |
| 5        | 26.4                        | 2.33, m                                                |
| 6        | 127.7                       | 5.26, dt (10.7, 6.9)                                   |
| 7        | 129.4                       | 5.98, t (10.8)                                         |
| 8        | 126.7                       | 6.29, dd (13.0, 11.0)                                  |
| 9        | 130.0                       | 5.69                                                   |
| 10       | 18.3                        | 1.78, d (6.5)                                          |
| 1'       | 46.9                        | 3.14, t (6.6)                                          |
| 2'       | 28.6                        | 1.80, m                                                |
| 3'       | 20.1                        | 0.92, d (6.7)                                          |
| 4'       | 20.1                        | 0.92, d (6.7)                                          |
| -NH      | -                           | 5.68                                                   |

<sup>1</sup> d: doublet, brd: broad doublet, dd: doublet of doublets, t: triplet, dt: doublet of triplets, m: multiplet, multiplicities are given only for not overlapping resonances.

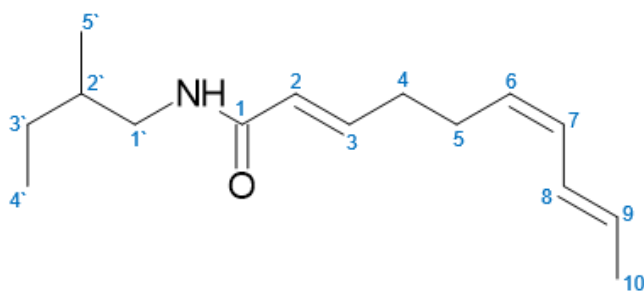

**Figure S3.** Structure of substance **9** (2E,6Z,8E)-N-(2-methylbutyl)-2,6,8-decatrienamide (homospilanthol).

**Table S3.** NMR-data of substance **9** (2E,6Z,8E)-N-(2-methylbutyl)-2,6,8-decatrienamide (homospilanthol) in CDCl<sub>3</sub> (700 MHz).

| Position | $\delta^{13}\text{C}$ [ppm] | $\delta^1\text{H}$ [ppm], Mult. <sup>1</sup> (J in Hz) |
|----------|-----------------------------|--------------------------------------------------------|
| 1        | 166.0                       | -                                                      |
| 2        | 124.1                       | 5.78, d (15.3)                                         |
| 3        | 143.5                       | 6.82, td (6.7, 15.2)                                   |
| 4        | 32.2                        | 2.26, q (7.4)                                          |
| 5        | 26.4                        | 2.32, q (7.4)                                          |
| 6        | 127.7                       | 5.27, dt (11.0, 7.5)                                   |
| 7        | 129.4                       | 5.97, t (11.0)                                         |
| 8        | 126.7                       | 6.29, t (13.0)                                         |
| 9        | 130.0                       | 5.71, m                                                |
| 10       | 18.3                        | 1.78, d (6.7)                                          |
| 1'       | 45.1                        | 3.26, m                                                |
|          |                             | 3.14, m                                                |
| 2'       | 35.0                        | 1.58                                                   |
| 3'       | 27.0                        | 1.41, m                                                |
|          |                             | 1.16, m                                                |
| 4'       | 11.3                        | 0.91                                                   |
| 5'       | 17.2                        | 0.91                                                   |
| -NH      | -                           | 5.41, brs                                              |

<sup>1</sup> brs: broad singlet, d: doublet, td: triplet of doublets, t: triplet, dt: doublet of triplets, q: quadruplet, m: multiplet, multiplicities are given only for not overlapping resonances.

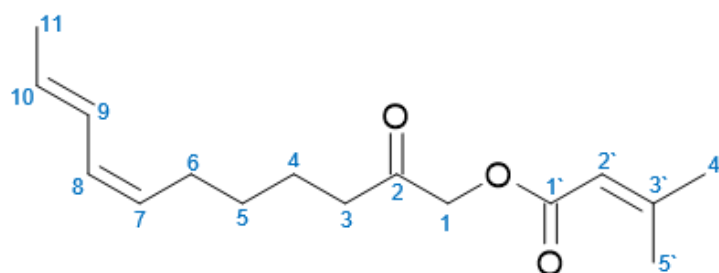

**Figure S4.** Structure of substance **A** (7Z,9E)-(2-Oxoundeca-7,9-dien-1-yl) 3-methylbut-2-enoate (acmellonate).

**Table S4.** NMR-data of substance **A** (7Z,9E)-(2-Oxoundeca-7,9-dien-1-yl) 3-methylbut-2-enoate (acmellonate) in CDCl<sub>3</sub> (700 MHz).

| Position | $\delta^{13}\text{C}$ [ppm] | $\delta^1\text{H}$ [ppm], Mult. <sup>1</sup> (J in Hz) |
|----------|-----------------------------|--------------------------------------------------------|
| 1        | 67.4                        | 4.64, s                                                |
| 2        | 204.7                       | -                                                      |
| 3        | 38.7                        | 2.44, t (7.2)                                          |
| 4        | 22.9                        | 1.64, quint (7.6)                                      |
| 5        | 29.2                        | 1.40, quint (7.6)                                      |
| 6        | 27.3                        | 2.17                                                   |
| 7        | 128.8                       | 5.25, dd (10.8, 7.6)                                   |
| 8        | 129.0                       | 5.95, t (11.4)                                         |
| 9        | 126.9                       | 6.29, t (13.1)                                         |
| 10       | 129.4                       | 5.67, m                                                |
| 11       | 18.3                        | 1.77, d (6.6)                                          |
| 1'       | 165.6                       | -                                                      |
| 2'       | 114.8                       | 5.80, s                                                |
| 3'       | 159.0                       | -                                                      |
| 4'       | 27.5                        | 1.93, s                                                |
| 5'       | 20.4                        | 2.18, s                                                |

<sup>1</sup> s: singlet, d: doublet, dd: doublet of doublets, t: triplet, quint: quintet, m: multiplet, multiplicities are given only for not overlapping resonances.

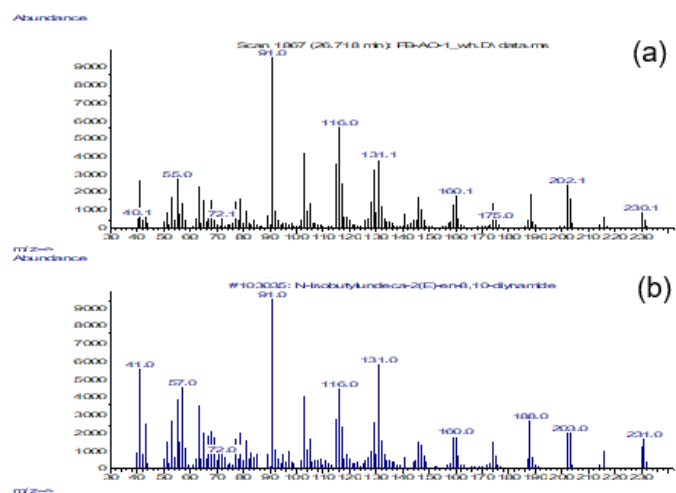

**Figure S5.** EI-MS spectrum of substance **3** (2E)-N-isobutyl-2-undecene-8,10-dynamide (a) with database reference spectrum (b).

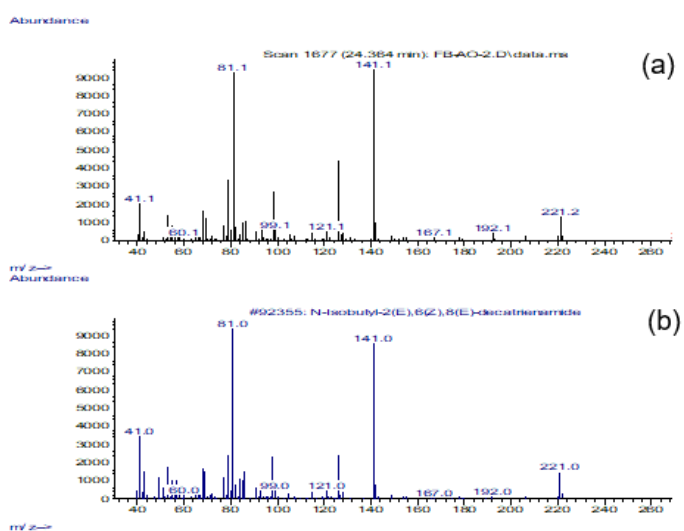

**Figure S6.** EI-MS spectrum of substance **5** (2E,6Z,8E)-N-isobutyl-2,6,8-decatrienamide (spilanthol) (a) with database reference spectrum (b).

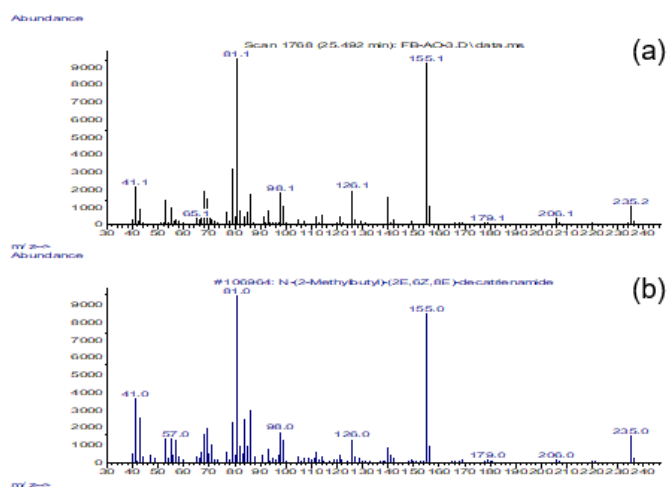

**Figure S7.** EI-MS spectrum of substance **9** (2E,6Z,8E)-N-(2-methylbutyl)-2,6,8-decatrienamide (homospilanthol) (a) with database reference spectrum (b).
